# Supplementary material
Source: publisher figshare collection journal article supplement (https://acs.figshare.com/ndownloader/files/4021699)
Supplement: Supplementary file 1 [file 4021699]

 
data_2 
 
_audit_creation_method            SHELXL-97 
_chemical_name_systematic 
; 
 ? 
; 
_chemical_name_common             ? 
_chemical_melting_point           ? 
_chemical_formula_moiety          ? 
_chemical_formula_sum 
 'C30 H32 Cl2 N8 O11 Ru' 
_chemical_formula_weight          852.61 
 
loop_ 
 _atom_type_symbol 
 _atom_type_description 
 _atom_type_scat_dispersion_real 
 _atom_type_scat_dispersion_imag 
 _atom_type_scat_source 
 'C'  'C'   0.0033   0.0016 
 'International Tables Vol C Tables 4.2.6.8 and 6.1.1.4' 
 'H'  'H'   0.0000   0.0000 
 'International Tables Vol C Tables 4.2.6.8 and 6.1.1.4' 
 'N'  'N'   0.0061   0.0033 
 'International Tables Vol C Tables 4.2.6.8 and 6.1.1.4' 
 'O'  'O'   0.0106   0.0060 
 'International Tables Vol C Tables 4.2.6.8 and 6.1.1.4' 
 'Ru'  'Ru'  -1.2594   0.8363 
 'International Tables Vol C Tables 4.2.6.8 and 6.1.1.4' 
 'Cl'  'Cl'   0.1484   0.1585 
 'International Tables Vol C Tables 4.2.6.8 and 6.1.1.4' 
 
_symmetry_cell_setting            monoclinic 
_symmetry_space_group_name_H-M    P21/c
 
loop_ 
 _symmetry_equiv_pos_as_xyz 
 'x, y, z' 
 '-x, y+1/2, -z+1/2' 
 '-x, -y, -z' 
 'x, -y-1/2, z-1/2' 
 
_cell_length_a                    8.483(4) 
_cell_length_b                    19.513(10) 
_cell_length_c                    21.032(10) 
_cell_angle_alpha                 90.00 
_cell_angle_beta                  94.393(8) 
_cell_angle_gamma                 90.00 
_cell_volume                      3471(3) 
_cell_formula_units_Z             4 
_cell_measurement_temperature     293(2) 
_cell_measurement_reflns_used     5885 
_cell_measurement_theta_min       1.94 
_cell_measurement_theta_max       25.00 
 
_exptl_crystal_description        block
_exptl_crystal_colour             red
_exptl_crystal_size_max           0.38 
_exptl_crystal_size_mid           0.26 
_exptl_crystal_size_min           0.22 
_exptl_crystal_density_meas       ? 
_exptl_crystal_density_diffrn     1.632 
_exptl_crystal_density_method     'not measured' 
_exptl_crystal_F_000              1736 
_exptl_absorpt_coefficient_mu     0.677 
_exptl_absorpt_correction_type    'multi-scan' 
_exptl_absorpt_correction_T_min   0.7829 
_exptl_absorpt_correction_T_max   0.8653 
_exptl_absorpt_process_details    ? 
 
_exptl_special_details 
; 
 ? 
; 
 
_diffrn_ambient_temperature       293(2) 
_diffrn_radiation_wavelength      0.71073 
_diffrn_radiation_type            MoK\a 
_diffrn_radiation_source          'fine-focus sealed tube' 
_diffrn_radiation_monochromator   graphite 
_diffrn_measurement_device_type   'Bruker Smart Apex CCD area detector' 
_diffrn_measurement_method        'phi and omega scans' 
_diffrn_detector_area_resol_mean  ? 
_diffrn_standards_number          ? 
_diffrn_standards_interval_count  ? 
_diffrn_standards_interval_time   ? 
_diffrn_standards_decay_%         negligible 
_diffrn_reflns_number             14007 
_diffrn_reflns_av_R_equivalents   0.0372 
_diffrn_reflns_av_sigmaI/netI     0.0537 
_diffrn_reflns_limit_h_min        -10 
_diffrn_reflns_limit_h_max        10 
_diffrn_reflns_limit_k_min        -19 
_diffrn_reflns_limit_k_max        23 
_diffrn_reflns_limit_l_min        -25 
_diffrn_reflns_limit_l_max        16 
_diffrn_reflns_theta_min          1.94 
_diffrn_reflns_theta_max          25.00 
_reflns_number_total              5885 
_reflns_number_gt                 4161 
_reflns_threshold_expression      >2sigma(I) 
 
_computing_data_collection        ? 
_computing_cell_refinement        ? 
_computing_data_reduction         ? 
_computing_structure_solution     'SHELXS-97 (Sheldrick, 1990)' 
_computing_structure_refinement   'SHELXL-97 (Sheldrick, 1997)' 
_computing_molecular_graphics     ? 
_computing_publication_material   ? 
 
_refine_special_details 
; 
 Refinement of F^2^ against ALL reflections.  The weighted R-factor wR and 
 goodness of fit S are based on F^2^, conventional R-factors R are based 
 on F, with F set to zero for negative F^2^. The threshold expression of 
 F^2^ > 2sigma(F^2^) is used only for calculating R-factors(gt) etc. and is 
 not relevant to the choice of reflections for refinement.  R-factors based 
 on F^2^ are statistically about twice as large as those based on F, and R- 
 factors based on ALL data will be even larger. 
; 
 
_refine_ls_structure_factor_coef  Fsqd  
_refine_ls_matrix_type            full 
_refine_ls_weighting_scheme       calc  
_refine_ls_weighting_details 
 'calc w=1/[\s^2^(Fo^2^)+(0.2356P)^2^+1.9696P] where P=(Fo^2^+2Fc^2^)/3' 
_atom_sites_solution_primary      direct 
_atom_sites_solution_secondary    difmap 
_atom_sites_solution_hydrogens    geom 
_refine_ls_hydrogen_treatment     constr 
_refine_ls_extinction_method      none 
_refine_ls_extinction_coef        ? 
_refine_ls_number_reflns          5885 
_refine_ls_number_parameters      459 
_refine_ls_number_restraints      10 
_refine_ls_R_factor_all           0.1164 
_refine_ls_R_factor_gt            0.0903 
_refine_ls_wR_factor_ref          0.3099 
_refine_ls_wR_factor_gt           0.2658 
_refine_ls_goodness_of_fit_ref    1.023 
_refine_ls_restrained_S_all       1.026 
_refine_ls_shift/su_max           0.001 
_refine_ls_shift/su_mean          0.000 
 
loop_ 
 _atom_site_label 
 _atom_site_type_symbol 
 _atom_site_fract_x 
 _atom_site_fract_y 
 _atom_site_fract_z 
 _atom_site_U_iso_or_equiv 
 _atom_site_adp_type 
 _atom_site_occupancy 
 _atom_site_symmetry_multiplicity 
 _atom_site_calc_flag 
 _atom_site_refinement_flags 
 _atom_site_disorder_assembly 
 _atom_site_disorder_group 
Ru1 Ru -0.18125(6) 0.88741(3) 0.82069(3) 0.0443(3) Uani 1 1 d . . . 
Cl1 Cl -0.4702(3) 1.22420(17) 0.89290(15) 0.0897(9) Uani 1 1 d . . . 
C1 C -0.0059(10) 1.0079(6) 0.7682(4) 0.071(3) Uani 1 1 d . . . 
H1A H -0.0002 0.9810 0.7319 0.085 Uiso 1 1 calc R . . 
C2 C 0.0602(11) 1.0725(6) 0.7693(6) 0.081(3) Uani 1 1 d . . . 
H2A H 0.1108 1.0888 0.7346 0.097 Uiso 1 1 calc R . . 
C3 C 0.0497(14) 1.1126(5) 0.8232(7) 0.082(3) Uani 1 1 d . . . 
H3A H 0.0933 1.1563 0.8251 0.099 Uiso 1 1 calc R . . 
C4 C -0.0261(12) 1.0871(6) 0.8739(5) 0.070(2) Uani 1 1 d . . . 
H4A H -0.0330 1.1134 0.9104 0.084 Uiso 1 1 calc R . . 
C5 C -0.0918(9) 1.0221(5) 0.8702(4) 0.054(2) Uani 1 1 d . . . 
C6 C -0.1783(8) 0.9905(5) 0.9201(4) 0.0508(19) Uani 1 1 d . . . 
C7 C -0.2089(11) 1.0240(6) 0.9762(4) 0.072(3) Uani 1 1 d . . . 
H7A H -0.1774 1.0692 0.9831 0.087 Uiso 1 1 calc R . . 
C8 C -0.2882(11) 0.9885(6) 1.0221(4) 0.073(3) Uani 1 1 d . . . 
H8A H -0.3097 1.0098 1.0601 0.088 Uiso 1 1 calc R . . 
C9 C -0.3338(11) 0.9220(6) 1.0103(4) 0.066(2) Uani 1 1 d . . . 
H9A H -0.3845 0.8968 1.0402 0.079 Uiso 1 1 calc R . . 
C10 C -0.3024(10) 0.8944(5) 0.9537(4) 0.057(2) Uani 1 1 d . . . 
H10A H -0.3366 0.8497 0.9457 0.069 Uiso 1 1 calc R . . 
C11 C 0.1513(9) 0.8638(6) 0.8795(4) 0.063(2) Uani 1 1 d . . . 
H11A H 0.1747 0.9070 0.8640 0.076 Uiso 1 1 calc R . . 
C12 C 0.2655(12) 0.8290(8) 0.9152(5) 0.091(4) Uani 1 1 d . . . 
H12A H 0.3631 0.8496 0.9253 0.109 Uiso 1 1 calc R . . 
C13 C 0.2392(14) 0.7655(9) 0.9359(5) 0.094(4) Uani 1 1 d . . . 
H13A H 0.3171 0.7413 0.9599 0.113 Uiso 1 1 calc R . . 
C14 C 0.0904(12) 0.7371(6) 0.9201(5) 0.073(3) Uani 1 1 d . . . 
H14A H 0.0689 0.6927 0.9331 0.088 Uiso 1 1 calc R . . 
C15 C -0.0235(10) 0.7734(5) 0.8859(4) 0.055(2) Uani 1 1 d . . . 
C16 C -0.1833(10) 0.7482(5) 0.8672(4) 0.057(2) Uani 1 1 d . . . 
C17 C -0.2369(13) 0.6828(6) 0.8801(5) 0.079(3) Uani 1 1 d . . . 
H17A H -0.1712 0.6515 0.9025 0.095 Uiso 1 1 calc R . . 
C18 C -0.3889(15) 0.6652(6) 0.8591(6) 0.088(3) Uani 1 1 d . . . 
H18A H -0.4291 0.6226 0.8696 0.106 Uiso 1 1 calc R . . 
C19 C -0.4777(12) 0.7082(6) 0.8241(5) 0.079(3) Uani 1 1 d . . . 
H19A H -0.5775 0.6948 0.8072 0.095 Uiso 1 1 calc R . . 
C20 C -0.4240(10) 0.7712(5) 0.8130(4) 0.061(2) Uani 1 1 d . . . 
H20A H -0.4912 0.8015 0.7901 0.073 Uiso 1 1 calc R . . 
C21 C 0.1017(11) 0.7854(6) 0.7262(4) 0.079(3) Uani 1 1 d . . . 
H21A H 0.1125 0.7961 0.7708 0.118 Uiso 1 1 calc R . . 
H21B H 0.1945 0.8002 0.7067 0.118 Uiso 1 1 calc R . . 
H21C H 0.0892 0.7368 0.7207 0.118 Uiso 1 1 calc R . . 
C22 C -0.0396(9) 0.8212(5) 0.6956(4) 0.057(2) Uani 1 1 d . . . 
C23 C -0.0940(10) 0.8198(6) 0.6318(4) 0.067(3) Uani 1 1 d . . . 
C24 C -0.0307(14) 0.7866(7) 0.5762(5) 0.098(4) Uani 1 1 d . . . 
H24A H -0.1003 0.7952 0.5389 0.147 Uiso 1 1 calc R . . 
H24B H -0.0228 0.7381 0.5834 0.147 Uiso 1 1 calc R . . 
H24C H 0.0721 0.8049 0.5700 0.147 Uiso 1 1 calc R . . 
C25 C -0.2536(10) 0.8786(5) 0.6857(4) 0.057(2) Uani 1 1 d . . . 
C26 C -0.3845(9) 0.9200(5) 0.7070(4) 0.059(2) Uani 1 1 d . . . 
C27 C -0.4844(10) 0.9731(6) 0.8001(4) 0.063(2) Uani 1 1 d . . . 
C28 C -0.4798(13) 1.0488(7) 0.7797(6) 0.092(3) Uani 1 1 d . . . 
H28A H -0.5529 1.0747 0.8028 0.139 Uiso 1 1 calc R . . 
H28B H -0.5085 1.0524 0.7348 0.139 Uiso 1 1 calc R . . 
H28C H -0.3749 1.0665 0.7889 0.139 Uiso 1 1 calc R . . 
C29 C -0.6592(10) 0.9453(7) 0.6679(5) 0.080(3) Uani 1 1 d . . . 
C30 C -0.7571(14) 0.9591(9) 0.6085(6) 0.121(6) Uani 1 1 d . . . 
H30A H -0.8665 0.9604 0.6172 0.181 Uiso 1 1 calc R . . 
H30B H -0.7414 0.9234 0.5782 0.181 Uiso 1 1 calc R . . 
H30C H -0.7274 1.0023 0.5913 0.181 Uiso 1 1 calc R . . 
N1 N -0.0784(7) 0.9823(3) 0.8177(3) 0.0463(15) Uani 1 1 d . . . 
N2 N -0.2260(6) 0.9257(3) 0.9078(3) 0.0422(14) Uani 1 1 d . . . 
N3 N 0.0053(7) 0.8379(4) 0.8659(3) 0.0503(16) Uani 1 1 d . . . 
N4 N -0.2772(7) 0.7933(3) 0.8331(3) 0.0481(15) Uani 1 1 d . . . 
N5 N -0.1430(7) 0.8574(3) 0.7283(3) 0.0473(15) Uani 1 1 d . . . 
N6 N -0.2277(9) 0.8550(5) 0.6271(3) 0.066(2) Uani 1 1 d . . . 
H6A H -0.2875 0.8616 0.5927 0.079 Uiso 1 1 calc R . . 
N7 N -0.3789(7) 0.9294(3) 0.7686(3) 0.0472(15) Uani 1 1 d . . . 
N8 N -0.4977(8) 0.9415(5) 0.6621(3) 0.077(3) Uani 1 1 d . . . 
H8B H -0.4656 0.9541 0.6261 0.092 Uiso 1 1 calc R . . 
O1 O -0.5430(7) 0.9548(4) 0.8453(3) 0.082(2) Uani 1 1 d . . . 
Cl2 Cl -0.2251(8) 1.0573(4) 0.5907(4) 0.200(3) Uani 1 1 d D . . 
O2 O -0.7107(8) 0.9341(5) 0.7196(4) 0.105(3) Uani 1 1 d . . . 
O1W O -0.4201(19) 0.8935(9) 0.5228(6) 0.196(8) Uani 1 1 d . . . 
H1WA H -0.4136 0.8574 0.5005 0.294 Uiso 1 1 d R . . 
H1WB H -0.5130 0.9068 0.5107 0.294 Uiso 1 1 d R . . 
O3 O -0.4086(16) 1.2855(8) 0.8780(11) 0.231(9) Uani 1 1 d . . . 
O4 O -0.5914(16) 1.2014(7) 0.8505(7) 0.176(6) Uani 1 1 d . . . 
O5 O -0.3542(13) 1.1750(5) 0.9043(6) 0.148(4) Uani 1 1 d . . . 
O6 O -0.5468(16) 1.2352(8) 0.9516(6) 0.161(5) Uani 1 1 d . . . 
O10 O -0.3719(15) 1.0377(11) 0.5630(7) 0.268(12) Uani 1 1 d D . . 
O7 O -0.142(3) 0.9973(9) 0.6109(12) 0.44(2) Uiso 1 1 d D . . 
O9 O -0.138(2) 1.0908(10) 0.5472(8) 0.311(13) Uiso 1 1 d D . . 
O8 O -0.243(3) 1.0970(10) 0.6442(7) 0.346(17) Uani 1 1 d D . . 
 
loop_ 
 _atom_site_aniso_label 
 _atom_site_aniso_U_11 
 _atom_site_aniso_U_22 
 _atom_site_aniso_U_33 
 _atom_site_aniso_U_23 
 _atom_site_aniso_U_13 
 _atom_site_aniso_U_12 
Ru1 0.0334(4) 0.0651(6) 0.0351(4) -0.0042(3) 0.0065(3) 0.0009(2) 
Cl1 0.0731(16) 0.097(2) 0.098(2) 0.0114(16) -0.0015(15) -0.0032(15) 
C1 0.052(5) 0.102(8) 0.059(5) 0.004(5) 0.016(4) -0.005(5) 
C2 0.061(5) 0.096(8) 0.088(8) 0.030(7) 0.021(5) -0.006(6) 
C3 0.074(7) 0.064(7) 0.109(10) 0.011(6) 0.009(7) -0.012(5) 
C4 0.068(6) 0.071(6) 0.071(6) -0.005(5) 0.007(5) -0.008(5) 
C5 0.039(4) 0.067(6) 0.056(5) 0.003(4) 0.000(3) 0.007(4) 
C6 0.038(4) 0.071(6) 0.043(4) -0.007(4) 0.001(3) 0.004(4) 
C7 0.069(6) 0.088(7) 0.059(6) -0.016(5) 0.006(5) 0.010(5) 
C8 0.071(6) 0.107(8) 0.043(5) -0.024(5) 0.016(4) -0.004(6) 
C9 0.064(5) 0.095(7) 0.041(5) 0.000(5) 0.014(4) -0.011(5) 
C10 0.048(4) 0.078(6) 0.046(5) -0.004(4) 0.007(4) -0.006(4) 
C11 0.040(4) 0.082(6) 0.067(5) -0.015(5) 0.002(4) 0.007(4) 
C12 0.056(6) 0.147(12) 0.067(7) -0.020(7) -0.015(5) 0.000(7) 
C13 0.078(7) 0.142(12) 0.061(6) 0.007(7) -0.011(5) 0.028(8) 
C14 0.068(6) 0.092(8) 0.059(5) 0.004(5) 0.004(5) 0.004(5) 
C15 0.055(4) 0.072(6) 0.037(4) 0.003(4) 0.005(3) 0.006(4) 
C16 0.068(5) 0.065(5) 0.037(4) -0.003(4) 0.009(4) 0.000(4) 
C17 0.091(7) 0.074(7) 0.072(6) 0.012(5) 0.002(5) -0.004(6) 
C18 0.100(8) 0.074(7) 0.091(8) 0.003(6) 0.010(7) -0.026(6) 
C19 0.069(6) 0.086(8) 0.082(7) -0.010(6) 0.001(5) -0.020(6) 
C20 0.054(5) 0.065(6) 0.064(5) -0.009(4) 0.003(4) -0.016(4) 
C21 0.054(5) 0.124(9) 0.059(5) -0.008(6) 0.010(4) 0.027(5) 
C22 0.044(4) 0.076(6) 0.053(5) -0.011(4) 0.013(3) 0.006(4) 
C23 0.056(5) 0.102(8) 0.046(5) -0.016(5) 0.013(4) 0.012(5) 
C24 0.096(8) 0.143(11) 0.058(6) -0.026(7) 0.020(6) 0.031(8) 
C25 0.041(4) 0.091(7) 0.039(4) -0.007(4) 0.010(3) 0.003(4) 
C26 0.038(4) 0.090(7) 0.051(5) 0.002(5) 0.009(3) 0.006(4) 
C27 0.045(4) 0.105(8) 0.039(4) -0.006(5) 0.004(4) 0.008(4) 
C28 0.070(6) 0.120(10) 0.087(8) 0.006(7) 0.001(6) 0.015(6) 
C29 0.045(5) 0.142(11) 0.054(6) -0.007(6) 0.000(4) 0.013(5) 
C30 0.072(7) 0.212(17) 0.075(8) -0.024(9) -0.020(6) 0.047(9) 
N1 0.037(3) 0.049(4) 0.054(4) 0.003(3) 0.012(3) 0.001(3) 
N2 0.035(3) 0.052(4) 0.039(3) -0.002(3) 0.004(2) 0.002(3) 
N3 0.044(3) 0.066(5) 0.040(3) -0.008(3) 0.001(3) 0.002(3) 
N4 0.046(3) 0.057(4) 0.042(3) -0.006(3) 0.009(3) 0.000(3) 
N5 0.044(3) 0.054(4) 0.046(4) -0.005(3) 0.016(3) -0.002(3) 
N6 0.064(4) 0.097(6) 0.038(4) -0.004(4) 0.008(3) 0.007(4) 
N7 0.041(3) 0.057(4) 0.045(4) -0.004(3) 0.011(3) 0.004(3) 
N8 0.053(4) 0.135(8) 0.042(4) 0.018(4) 0.004(3) 0.022(4) 
O1 0.057(4) 0.136(7) 0.055(4) 0.009(4) 0.023(3) 0.021(4) 
Cl2 0.185(6) 0.181(6) 0.243(8) -0.007(6) 0.069(6) -0.023(5) 
O2 0.055(4) 0.186(10) 0.075(5) -0.017(6) 0.001(4) 0.004(5) 
O1W 0.166(12) 0.33(2) 0.083(7) 0.040(9) -0.045(8) -0.001(11) 
O3 0.140(10) 0.171(13) 0.40(2) 0.093(15) 0.143(14) -0.013(9) 
O4 0.161(11) 0.188(12) 0.169(11) -0.069(10) -0.055(9) 0.031(9) 
O5 0.113(7) 0.109(7) 0.221(13) -0.012(8) 0.003(8) 0.030(6) 
O6 0.167(11) 0.199(13) 0.122(8) 0.039(8) 0.044(8) 0.036(10) 
O10 0.172(14) 0.46(4) 0.163(13) 0.085(16) -0.028(11) -0.125(19) 
O8 0.48(5) 0.42(4) 0.138(15) -0.09(2) 0.04(2) 0.06(3) 
 
_geom_special_details 
; 
 All esds (except the esd in the dihedral angle between two l.s. planes) 
 are estimated using the full covariance matrix.  The cell esds are taken 
 into account individually in the estimation of esds in distances, angles 
 and torsion angles; correlations between esds in cell parameters are only 
 used when they are defined by crystal symmetry.  An approximate (isotropic) 
 treatment of cell esds is used for estimating esds involving l.s. planes. 
; 
 
loop_ 
 _geom_bond_atom_site_label_1 
 _geom_bond_atom_site_label_2 
 _geom_bond_distance 
 _geom_bond_site_symmetry_2 
 _geom_bond_publ_flag 
Ru1 N3 2.028(6) . ? 
Ru1 N4 2.034(7) . ? 
Ru1 N2 2.041(6) . ? 
Ru1 N1 2.050(6) . ? 
Ru1 N5 2.079(6) . ? 
Ru1 N7 2.098(6) . ? 
Cl1 O3 1.351(13) . ? 
Cl1 O5 1.382(10) . ? 
Cl1 O4 1.383(11) . ? 
Cl1 O6 1.455(12) . ? 
C1 N1 1.345(11) . ? 
C1 C2 1.380(15) . ? 
C2 C3 1.385(16) . ? 
C3 C4 1.380(16) . ? 
C4 C5 1.384(14) . ? 
C5 N1 1.362(10) . ? 
C5 C6 1.464(12) . ? 
C6 N2 1.346(11) . ? 
C6 C7 1.390(12) . ? 
C7 C8 1.402(14) . ? 
C8 C9 1.370(14) . ? 
C9 C10 1.352(12) . ? 
C10 N2 1.350(10) . ? 
C11 N3 1.348(11) . ? 
C11 C12 1.360(15) . ? 
C12 C13 1.338(18) . ? 
C13 C14 1.396(17) . ? 
C14 C15 1.359(13) . ? 
C15 N3 1.354(11) . ? 
C15 C16 1.468(12) . ? 
C16 N4 1.354(11) . ? 
C16 C17 1.389(14) . ? 
C17 C18 1.374(16) . ? 
C18 C19 1.314(16) . ? 
C19 C20 1.338(14) . ? 
C20 N4 1.355(10) . ? 
C21 C22 1.490(12) . ? 
C22 N5 1.354(10) . ? 
C22 C23 1.385(12) . ? 
C23 N6 1.323(12) . ? 
C23 C24 1.475(12) . ? 
C25 N5 1.313(10) . ? 
C25 N6 1.350(10) . ? 
C25 C26 1.470(12) . ? 
C26 N7 1.306(10) . ? 
C26 N8 1.361(10) . ? 
C27 O1 1.162(11) . ? 
C27 N7 1.435(11) . ? 
C27 C28 1.539(16) . ? 
C29 O2 1.221(12) . ? 
C29 N8 1.387(11) . ? 
C29 C30 1.471(14) . ? 
Cl2 O9 1.381(8) . ? 
Cl2 O8 1.384(8) . ? 
Cl2 O10 1.387(8) . ? 
Cl2 O7 1.414(9) . ? 
 
loop_ 
 _geom_angle_atom_site_label_1 
 _geom_angle_atom_site_label_2 
 _geom_angle_atom_site_label_3 
 _geom_angle 
 _geom_angle_site_symmetry_1 
 _geom_angle_site_symmetry_3 
 _geom_angle_publ_flag 
N3 Ru1 N4 79.3(3) . . ? 
N3 Ru1 N2 86.9(2) . . ? 
N4 Ru1 N2 96.4(2) . . ? 
N3 Ru1 N1 97.2(3) . . ? 
N4 Ru1 N1 174.3(2) . . ? 
N2 Ru1 N1 78.8(2) . . ? 
N3 Ru1 N5 97.6(2) . . ? 
N4 Ru1 N5 87.6(3) . . ? 
N2 Ru1 N5 174.5(2) . . ? 
N1 Ru1 N5 97.4(3) . . ? 
N3 Ru1 N7 174.1(3) . . ? 
N4 Ru1 N7 96.2(3) . . ? 
N2 Ru1 N7 97.5(2) . . ? 
N1 Ru1 N7 87.5(2) . . ? 
N5 Ru1 N7 78.3(2) . . ? 
O3 Cl1 O5 111.9(8) . . ? 
O3 Cl1 O4 114.6(12) . . ? 
O5 Cl1 O4 111.9(8) . . ? 
O3 Cl1 O6 105.9(11) . . ? 
O5 Cl1 O6 108.2(8) . . ? 
O4 Cl1 O6 103.7(9) . . ? 
N1 C1 C2 122.4(10) . . ? 
C1 C2 C3 118.6(9) . . ? 
C4 C3 C2 119.5(10) . . ? 
C3 C4 C5 119.7(10) . . ? 
N1 C5 C4 120.7(8) . . ? 
N1 C5 C6 114.7(7) . . ? 
C4 C5 C6 124.6(8) . . ? 
N2 C6 C7 122.2(8) . . ? 
N2 C6 C5 114.7(7) . . ? 
C7 C6 C5 123.1(9) . . ? 
C6 C7 C8 118.8(10) . . ? 
C9 C8 C7 119.1(8) . . ? 
C10 C9 C8 117.8(9) . . ? 
N2 C10 C9 125.9(9) . . ? 
N3 C11 C12 122.3(11) . . ? 
C13 C12 C11 120.8(11) . . ? 
C12 C13 C14 117.4(11) . . ? 
C15 C14 C13 120.8(12) . . ? 
N3 C15 C14 120.7(8) . . ? 
N3 C15 C16 114.4(7) . . ? 
C14 C15 C16 124.9(9) . . ? 
N4 C16 C17 120.8(8) . . ? 
N4 C16 C15 114.7(8) . . ? 
C17 C16 C15 124.4(9) . . ? 
C18 C17 C16 118.7(10) . . ? 
C19 C18 C17 120.3(11) . . ? 
C18 C19 C20 119.7(10) . . ? 
C19 C20 N4 123.7(9) . . ? 
N5 C22 C23 108.7(7) . . ? 
N5 C22 C21 123.9(7) . . ? 
C23 C22 C21 127.3(8) . . ? 
N6 C23 C22 106.5(7) . . ? 
N6 C23 C24 122.0(9) . . ? 
C22 C23 C24 131.5(9) . . ? 
N5 C25 N6 110.9(7) . . ? 
N5 C25 C26 118.8(7) . . ? 
N6 C25 C26 130.2(8) . . ? 
N7 C26 N8 128.0(8) . . ? 
N7 C26 C25 114.1(7) . . ? 
N8 C26 C25 117.8(7) . . ? 
O1 C27 N7 121.1(10) . . ? 
O1 C27 C28 122.9(10) . . ? 
N7 C27 C28 114.4(8) . . ? 
O2 C29 N8 119.5(8) . . ? 
O2 C29 C30 124.9(9) . . ? 
N8 C29 C30 115.6(9) . . ? 
C1 N1 C5 119.1(8) . . ? 
C1 N1 Ru1 125.4(6) . . ? 
C5 N1 Ru1 115.4(5) . . ? 
C6 N2 C10 116.2(7) . . ? 
C6 N2 Ru1 116.3(5) . . ? 
C10 N2 Ru1 127.5(5) . . ? 
C11 N3 C15 117.8(7) . . ? 
C11 N3 Ru1 126.3(7) . . ? 
C15 N3 Ru1 115.8(5) . . ? 
C16 N4 C20 116.6(8) . . ? 
C16 N4 Ru1 115.5(5) . . ? 
C20 N4 Ru1 127.9(6) . . ? 
C25 N5 C22 106.0(6) . . ? 
C25 N5 Ru1 113.2(5) . . ? 
C22 N5 Ru1 140.8(6) . . ? 
C23 N6 C25 107.8(7) . . ? 
C26 N7 C27 124.4(7) . . ? 
C26 N7 Ru1 115.5(5) . . ? 
C27 N7 Ru1 119.5(5) . . ? 
C26 N8 C29 127.2(8) . . ? 
O9 Cl2 O8 111.8(8) . . ? 
O9 Cl2 O10 111.0(8) . . ? 
O8 Cl2 O10 110.1(8) . . ? 
O9 Cl2 O7 108.3(8) . . ? 
O8 Cl2 O7 107.6(8) . . ? 
O10 Cl2 O7 107.8(8) . . ? 
 
loop_ 
 _geom_hbond_atom_site_label_D 
 _geom_hbond_atom_site_label_H 
 _geom_hbond_atom_site_label_A 
 _geom_hbond_distance_DH 
 _geom_hbond_distance_HA 
 _geom_hbond_distance_DA 
 _geom_hbond_angle_DHA 
 _geom_hbond_site_symmetry_A 
N6 H6A O1W  0.86 1.89 2.736(13) 169.1 . 
N8 H8B O10  0.86 2.28 3.057(17) 149.7 . 
O1W H1WB O10  0.85 2.07 2.77(2) 139.2 3_476 
 
_diffrn_measured_fraction_theta_max    0.962 
_diffrn_reflns_theta_full              25.00 
_diffrn_measured_fraction_theta_full   0.962 
_refine_diff_density_max    1.640 
_refine_diff_density_min   -1.223 
_refine_diff_density_rms    0.158 
